# Supplementary material
Source: Springer Nature journal article supplement (https://www.springermedizin.de/resource/supplementary/12955_2006_315_MOESM1_ESM.pdf/9560138)

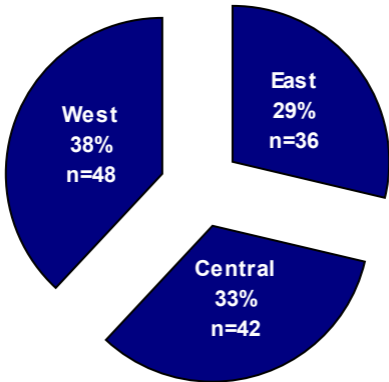

Supplement: MOESM1 [file 9560138]
